# Supplementary material for: EOMES interacts with RUNX3 and BRG1 to promote innate memory cell formation through epigenetic reprogramming
Source: PubMed Central journal article supplement (PMC6656725; doi:10.1038/s41467-019-11233-6), 2019-07-24
Supplement: 41467_2019_11233_MOESM1_ESM.pdf [file 41467_2019_11233_MOESM1_ESM.pdf]

## **Supplementary information**

### **EOMES interacts with RUNX3 and BRG1 to promote innate memory cell formation through epigenetic reprogramming**

*Istaces et al.*

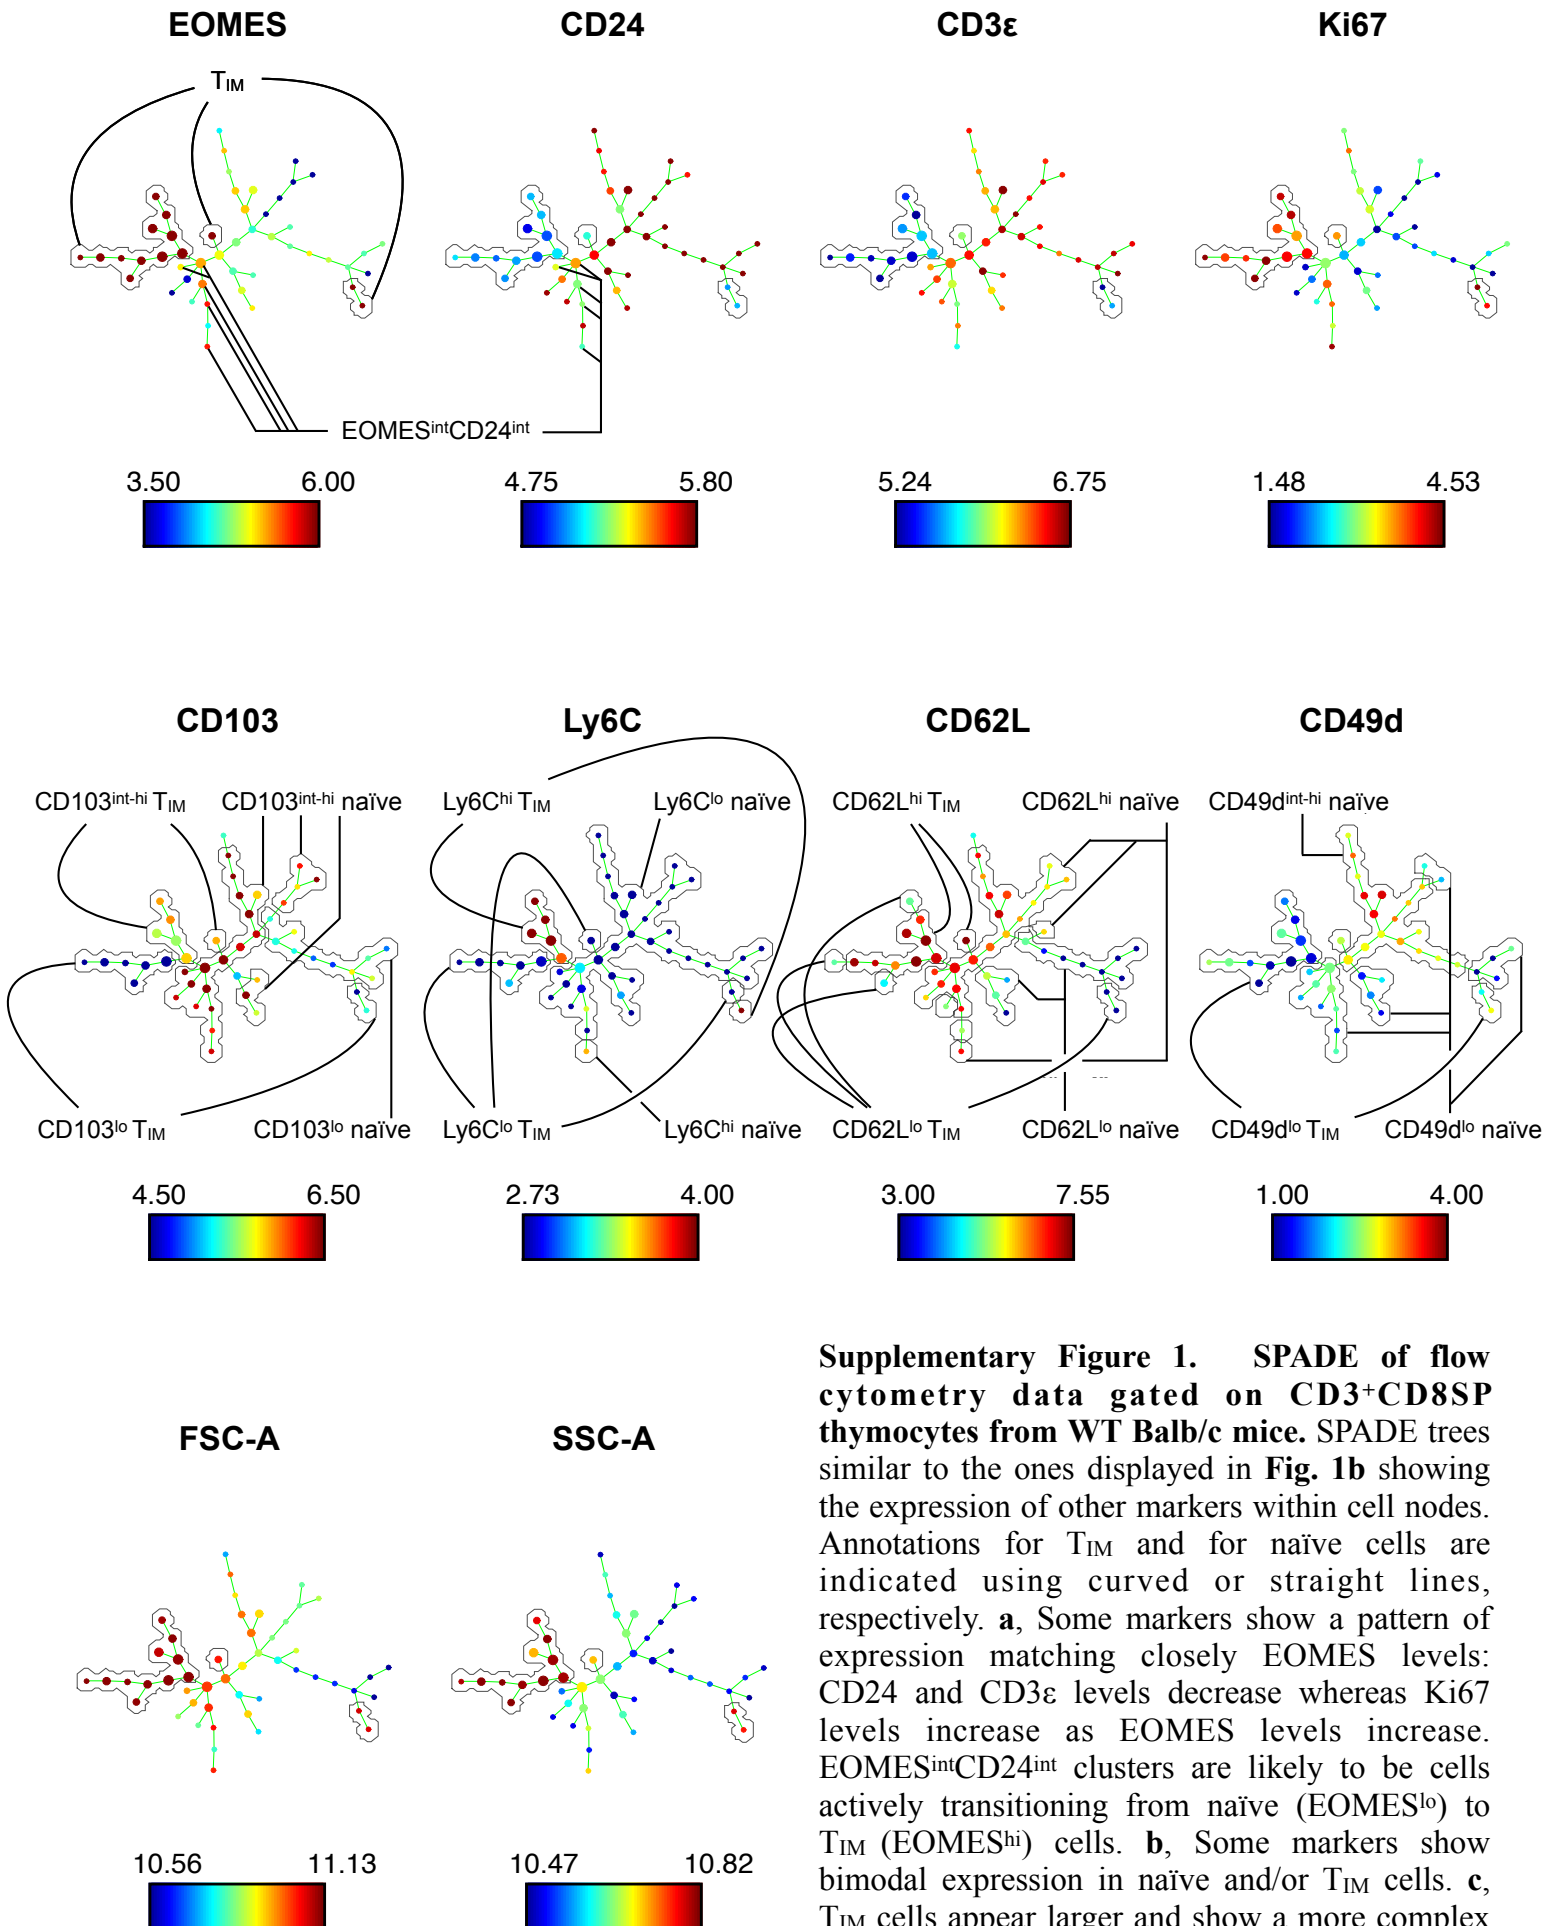

**Supplementary Figure 1. SPADE of flow cytometry data gated on CD3<sup>+</sup>CD8<sup>SP</sup> thymocytes from WT Balb/c mice.** SPADE trees similar to the ones displayed in Fig. 1b showing the expression of other markers within cell nodes. Annotations for T<sub>IM</sub> and for naïve cells are indicated using curved or straight lines, respectively. **a**, Some markers show a pattern of expression matching closely EOMES levels: CD24 and CD3 $\epsilon$  levels decrease whereas Ki67 levels increase as EOMES levels increase. EOMES<sup>int</sup>CD24<sup>int</sup> clusters are likely to be cells actively transitioning from naïve (EOMES<sup>lo</sup>) to T<sub>IM</sub> (EOMES<sup>hi</sup>) cells. **b**, Some markers show bimodal expression in naïve and/or T<sub>IM</sub> cells. **c**, T<sub>IM</sub> cells appear larger and show a more complex granularity than naïve cells.

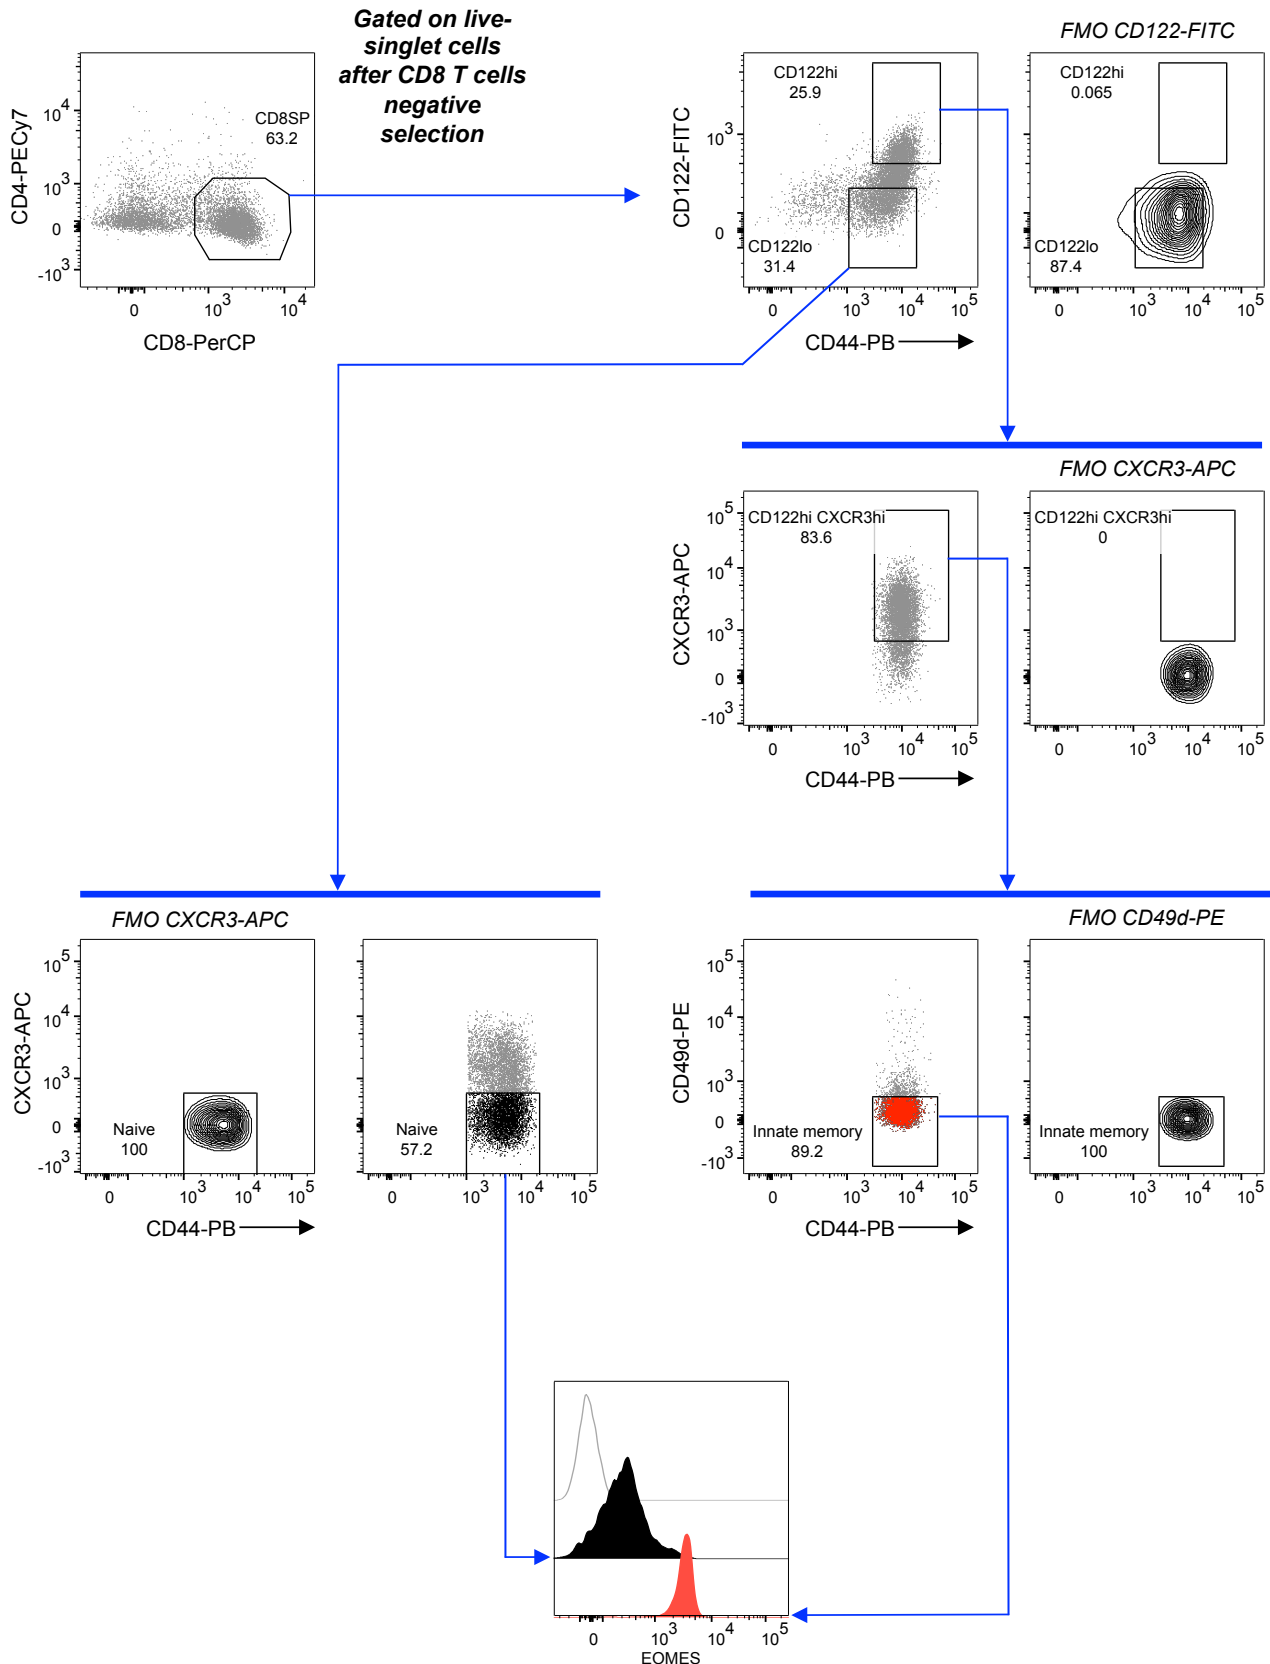

**Supplementary Figure 2. Sorting strategy of naïve and T<sub>IM</sub> CD8SP thymocytes from WT Balb/c mice.** After negative selection of CD8<sup>+</sup> cells, untouched cells were stained to exclude dead cells and incubated with Fc receptor-blocking antibodies and a surface staining antibody mix to be sorted as T<sub>IM</sub> (CD8<sup>+</sup>CD44<sup>hi</sup>CXCR3<sup>+</sup>CD122<sup>+</sup>CD49d<sup>lo</sup>) or naïve (CD8<sup>+</sup>CD44<sup>lo</sup>CXCR3<sup>-</sup>CD122<sup>-</sup>) cells. The obtained T<sub>IM</sub> cells are EOMES<sup>hi</sup>, whereas naïve cells are EOMES<sup>lo-int</sup>.

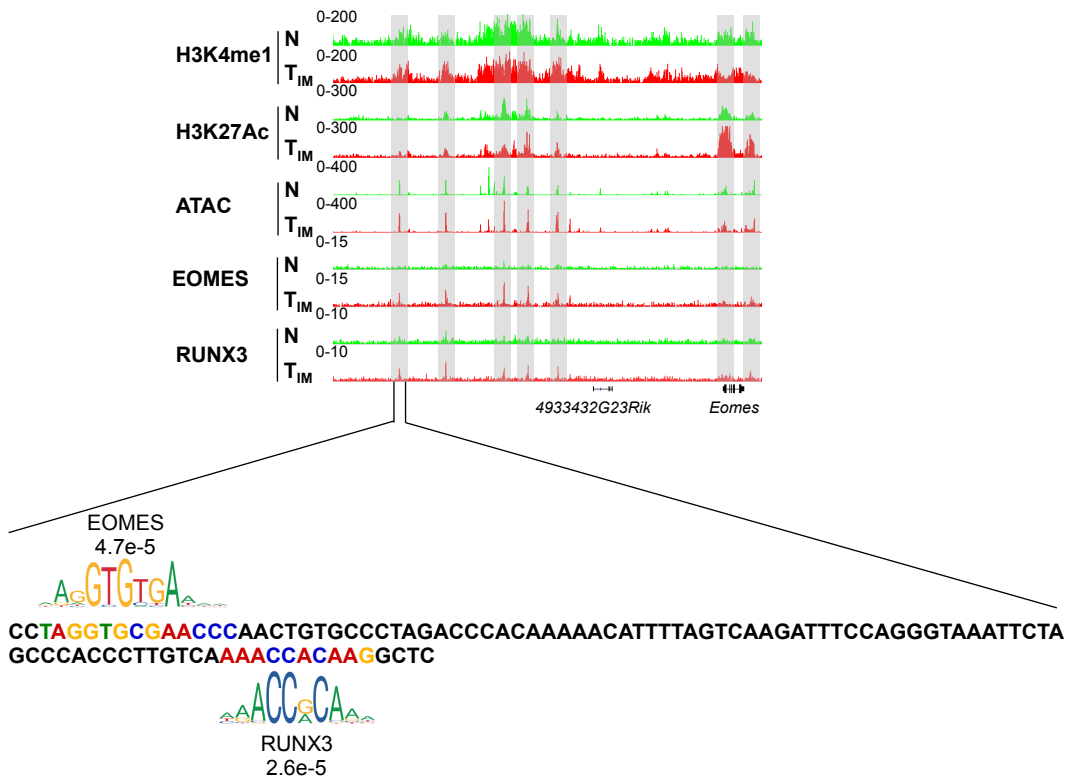

**Supplementary Figure 3.** Representative EOMES, RUNX3, H3K4me1, H3K27Ac ChIP-seq and ATAC-seq tracks at the *Eomes* locus in naïve and T<sub>IM</sub> CD8SP thymocytes showing the co-localisation of EOMES and RUNX3 (highlighted in grey, top). Sequence of the indicated region and the location of EOMES and RUNX motifs with their position p-value are shown (down).

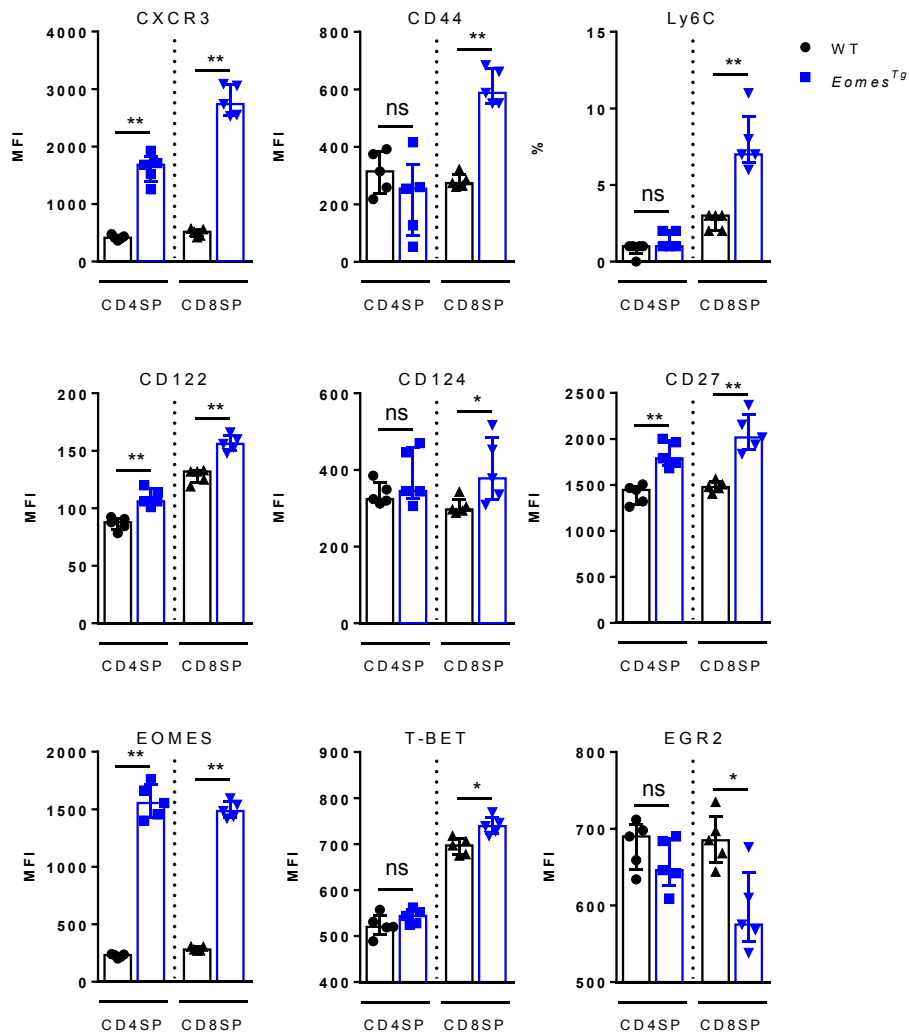

**Supplementary Figure 4. Distinct effects of EOMES ectopic expression in CD4SP and CD8SP thymocytes.** Thymocytes from WT or *Eomes*<sup>Tg</sup> mice were analyzed by flow cytometry for the indicated protein. Although some markers follow similar patterns between CD3<sup>+</sup>CD4SP and CD3<sup>+</sup>CD8SP thymocytes upon EOMES overexpression (CXCR3, CD122, CD27), other markers are only impacted in CD3<sup>+</sup>CD8SP (CD44, Ly6C, CD124, T-BET, EGR2), despite similar EOMES levels. Horizontal bars indicate median ± interquartile range (MFI or frequency). Each point represents a single mouse, n=5 mice per group). Statistics were calculated using Mann-Whitney test. ns not significant, \* P < 0.05, \*\* P < 0.01.

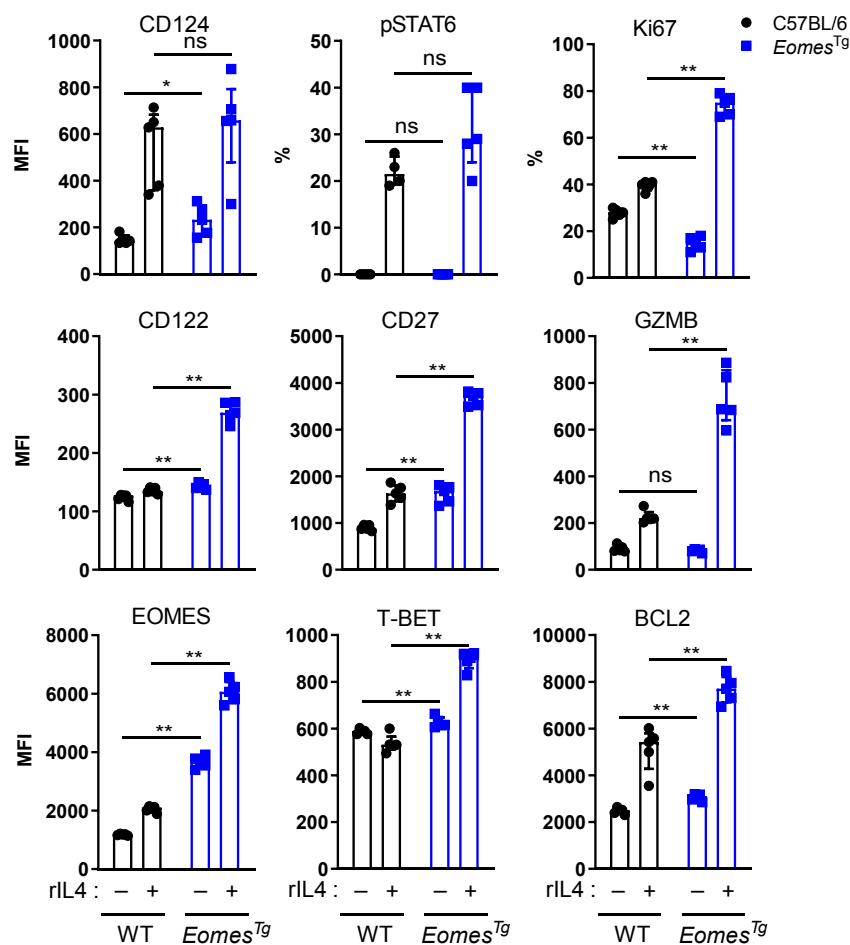

**Supplementary Figure 5. CD8SP thymocytes from *Eomes<sup>Tg</sup>* mice display heightened responsiveness upon *ex vivo* stimulation with rIL-4.** Thymocytes from WT and *Eomes<sup>Tg</sup>* mice were cultured in complete medium with or without rmIL-4 (20 ng ml<sup>-1</sup>) for 72h, except for phospho-STAT6 staining (30 min culture with or without rmIL-4 at 30 ng ml<sup>-1</sup>). Although CD124 basal levels are slightly higher in CD3<sup>+</sup>CD8SP thymocytes from *Eomes<sup>Tg</sup>* mice, early signalling (STAT6 phosphorylation) and latter CD124 upregulation (72h *ex vivo* IL-4 stimulation) are not different as compared to WT cells. Nonetheless, CD3<sup>+</sup>CD8SP thymocytes from *Eomes<sup>Tg</sup>* mice show stronger responses to IL-4 than WT mice, as they more readily proliferate (Ki67) and upregulate surface receptors (CD122, CD27) along with T-box transcription factors (EOMES, T-BET), effector (GZMB) and anti-apoptotic (BCL2) molecules. Horizontal bars indicate median ± interquartile range (MFI or frequency). Each point represents a single mouse, n=5 mice per group. Statistics were calculated using Mann-Whitney test. ns not significant, \* P < 0.05, \*\* P < 0.01

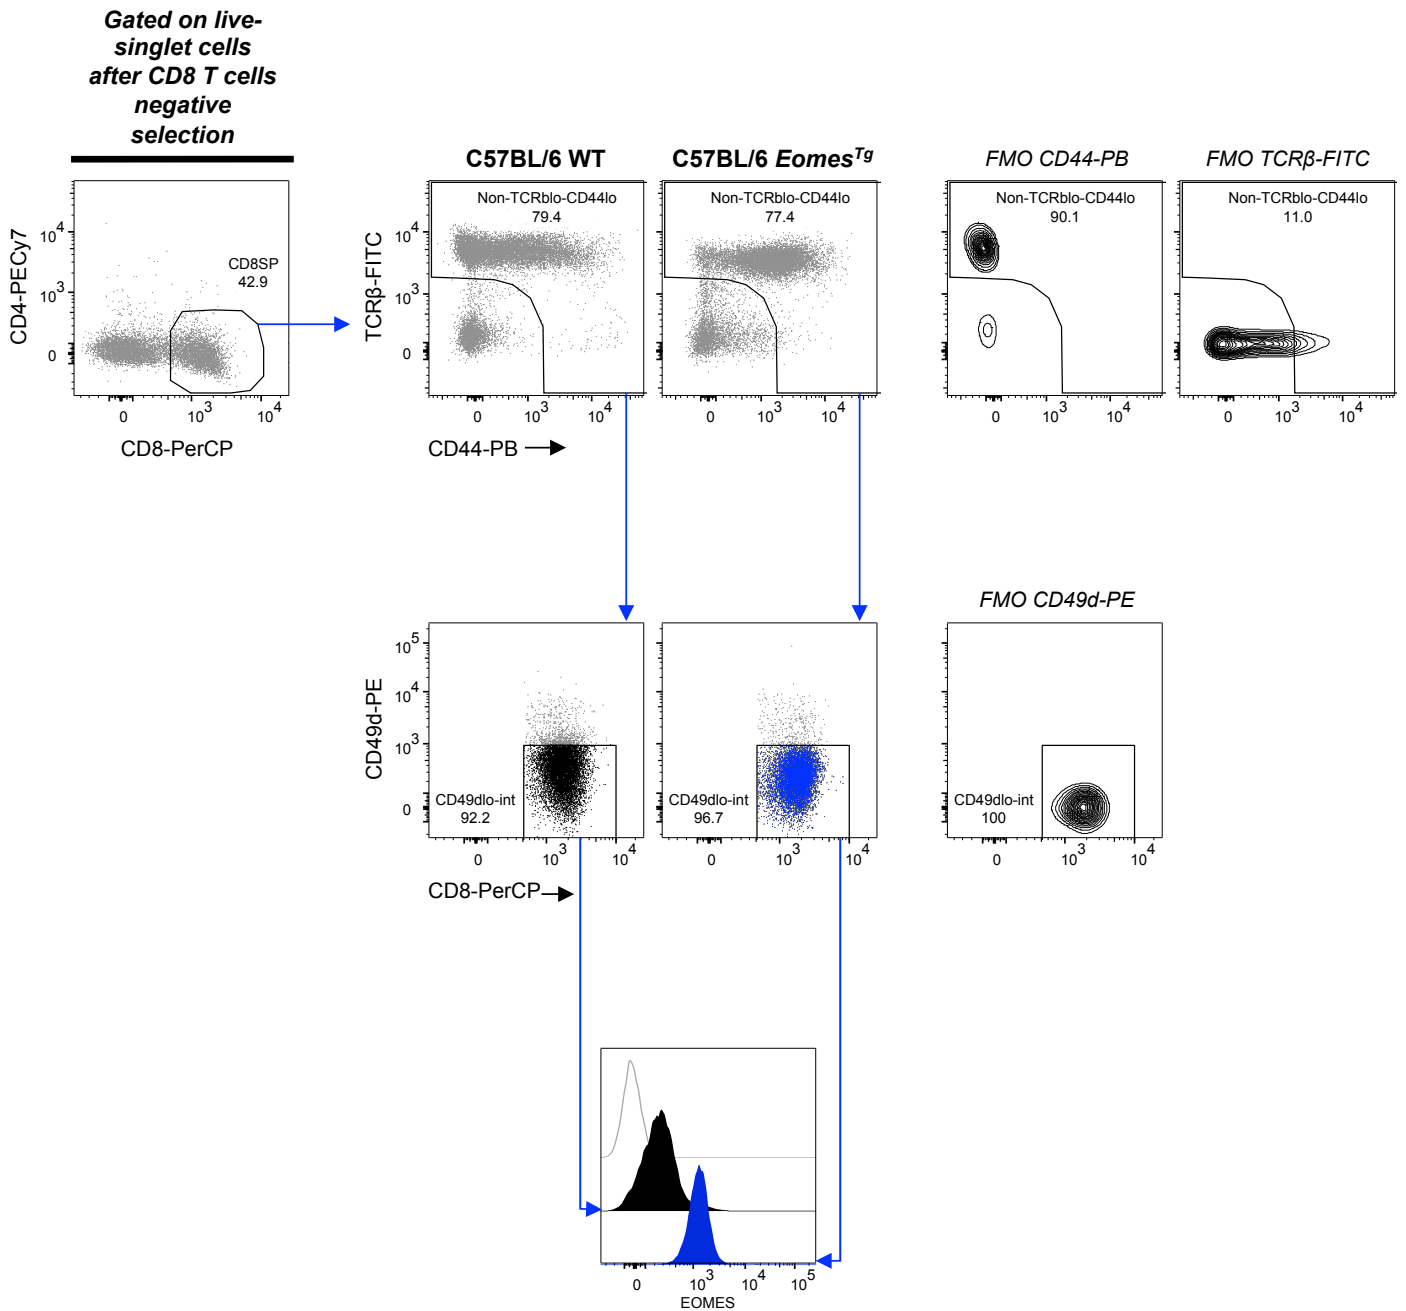

**Supplementary Figure 6. Sorting strategy of CD8SP thymocytes from WT and *Eomes*<sup>Tg</sup> C57BL/6 mice.** After CD8<sup>+</sup> negative selection, untouched cells were stained to exclude dead cells and incubated with Fc receptor-blocking antibodies and a surface staining antibody mix to be sorted as WT or *Eomes*<sup>Tg</sup> CD8SP thymocytes. In both cases, a TCRβ<sup>lo</sup>CD44<sup>lo</sup> population was removed from CD8<sup>+</sup> cells, as were CD49<sup>dhi</sup> cells.

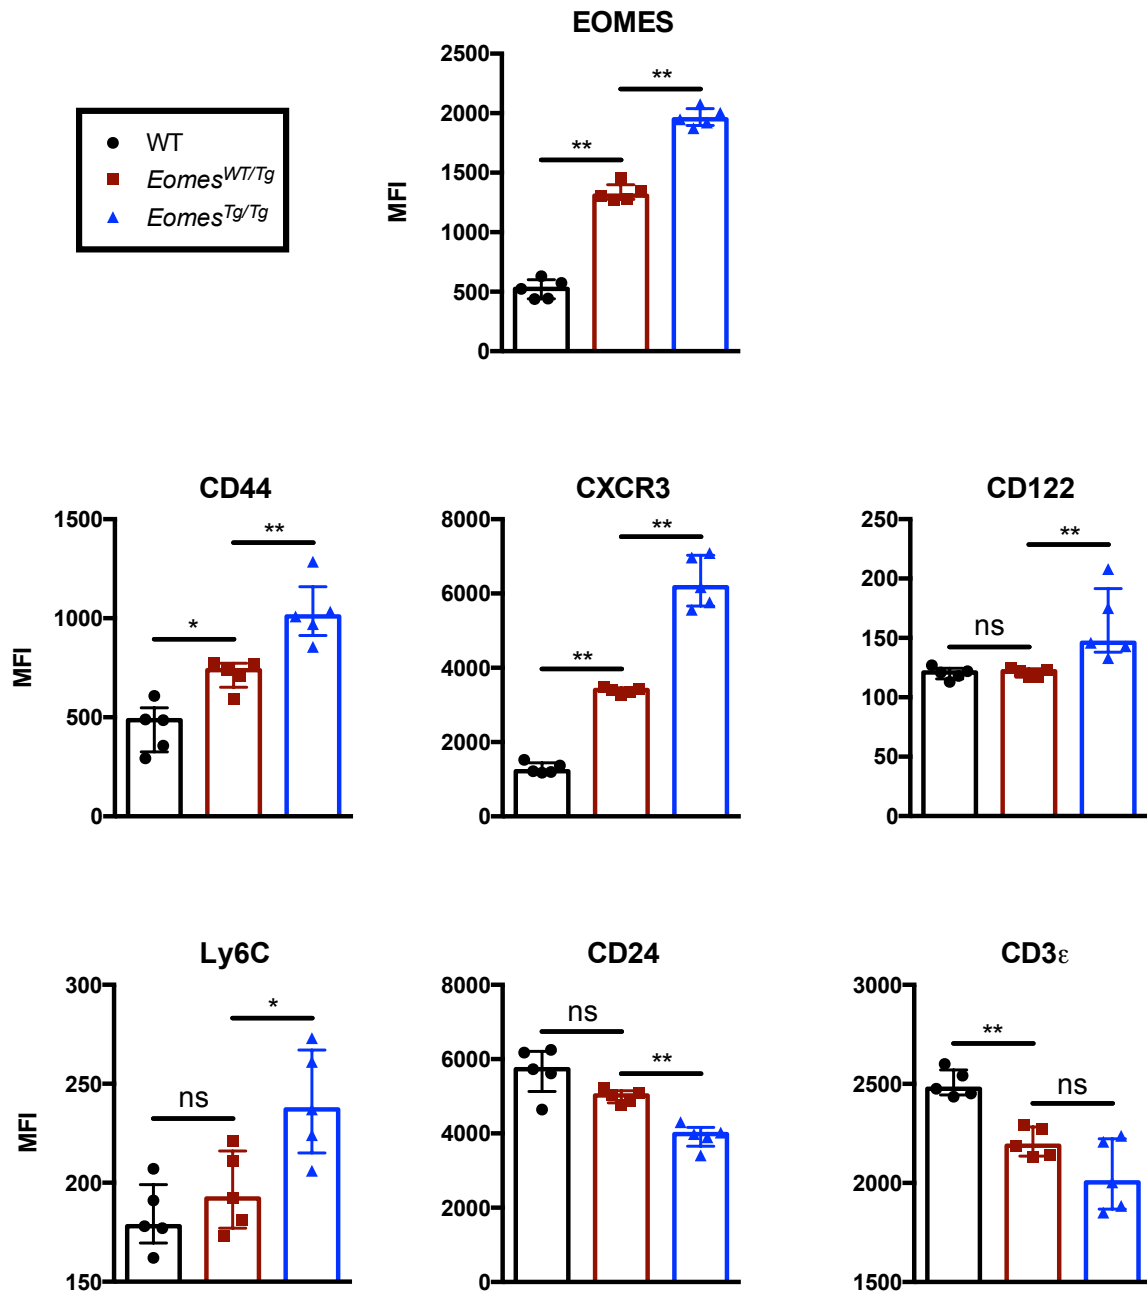

**Supplementary Figure 7. EOMES ectopic expression in CD3<sup>+</sup>CD8SP thymocytes impacts the expression of several surface markers in a dose-dependent fashion.** CD3<sup>+</sup>CD8SP thymocytes from WT, heterozygote (*Eomes<sup>WT/Tg</sup>*) or homozygote transgenic (*Eomes<sup>Tg/Tg</sup>*) mice expressing different levels of EOMES were analysed by flow cytometry for the indicated protein. Horizontal bars indicate median ± interquartile range (MFI). Each point represents a single mouse, n=5 mice per group. Statistics were calculated using Mann-Whitney test. ns not significant, \* P < 0.05, \*\* P < 0.01



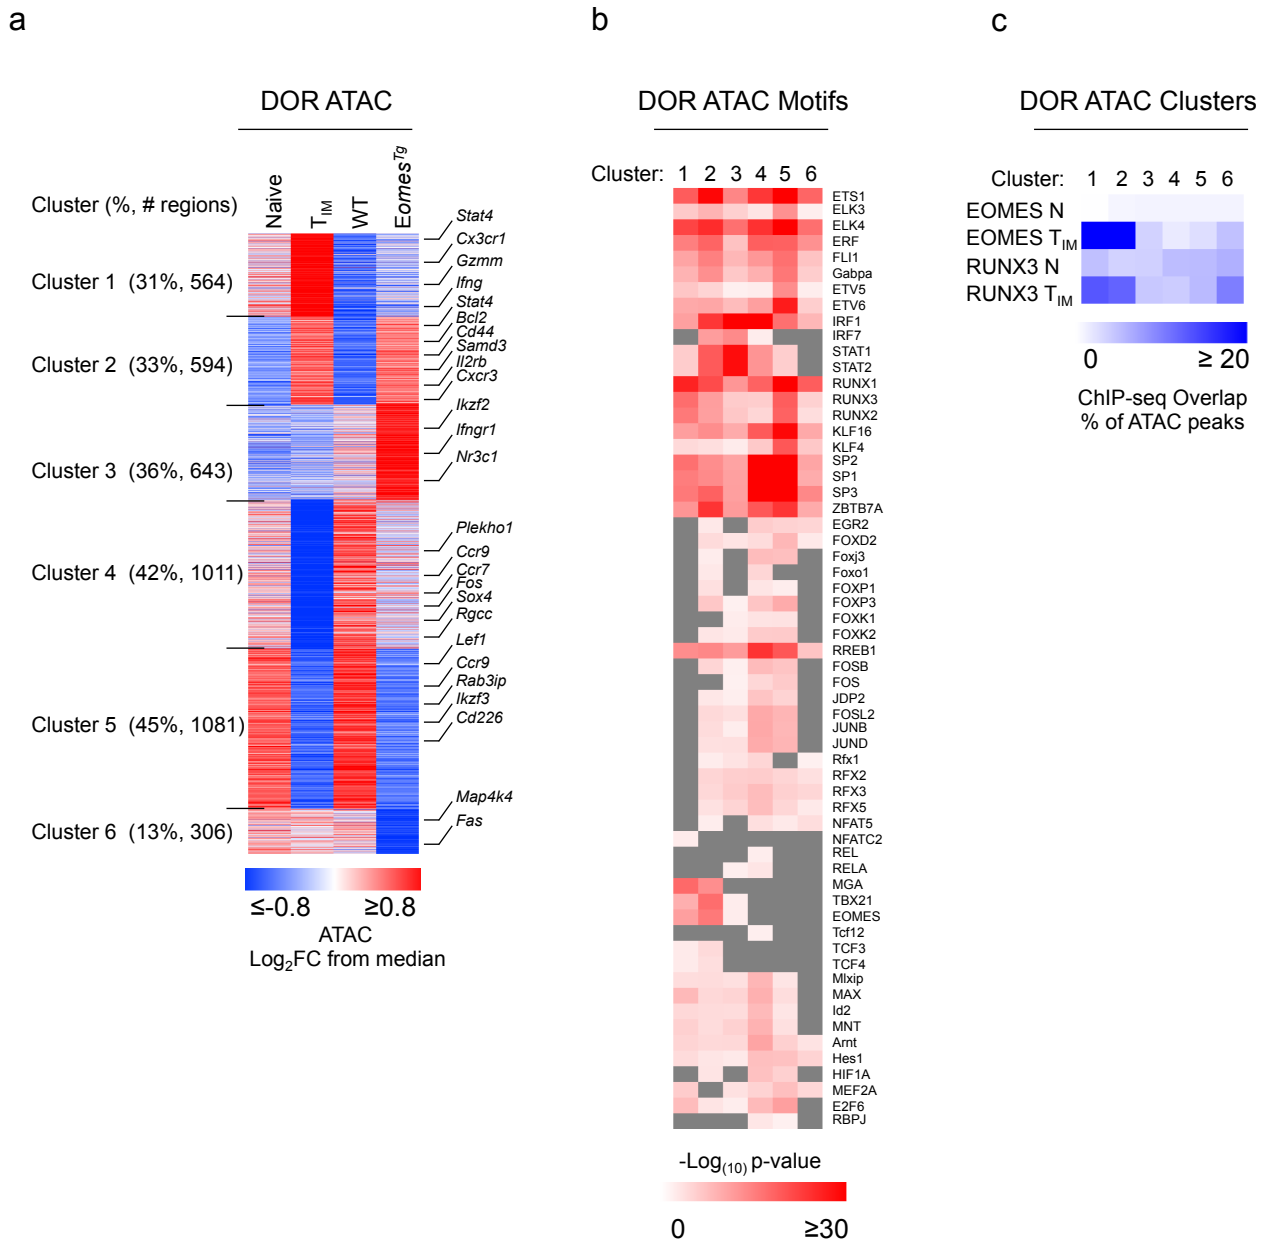

**Supplementary Figure 8. T<sub>IM</sub> and Eomes<sup>Tg</sup> CD8SP thymocytes share differentially open regions in enhancers characterised by T-box motifs enrichment.** **a**, Differentially open regions clustering within enhancers based on ATAC-seq signal in CD8SP thymocytes (Naïve, T<sub>IM</sub>, WT and Eomes<sup>Tg</sup>). Clusters in 1-3 and 4-6 are more or less open, respectively. Selected genes associated with each cluster are displayed in the right margin. **b**, Motif enrichment analysis of differentially active enhancers for clusters shown in **a** using AME and presented as -Log<sub>10</sub> of p values. **c**, Percentage of regions within each enhancers' cluster that overlaps with ChIP-seq peaks for EOMES and RUNX3. ChIP-seq was performed on 3 independent immunoprecipitations (n=5 mice per sample).

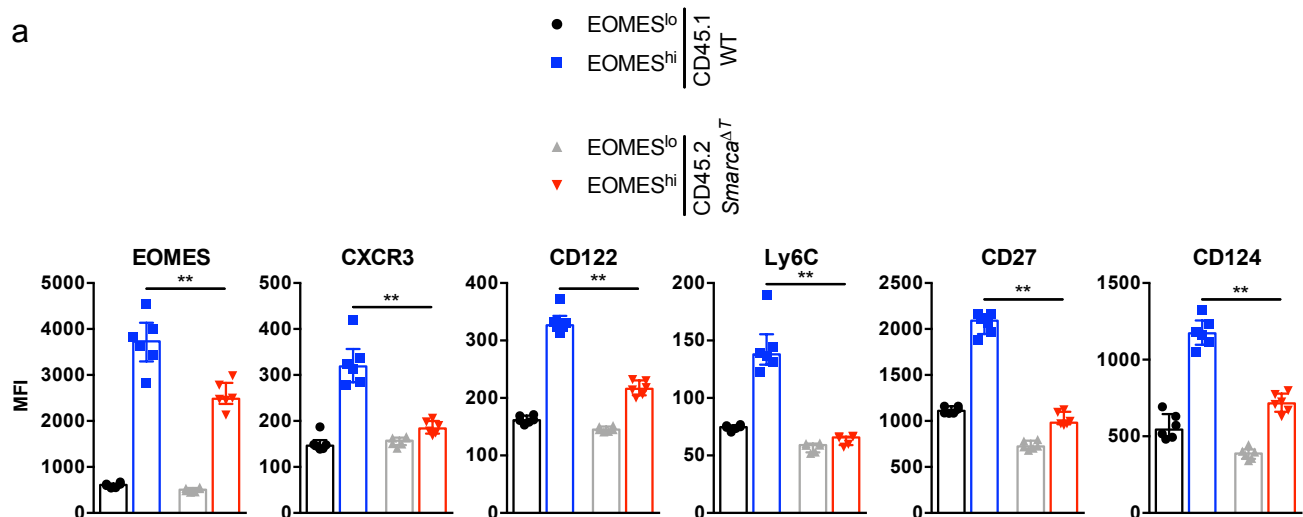

**b**

|                                           | scEOMES<br>(x)                    | scCXCR3<br>(y)              | scCD122<br>(y)              | scLy6C<br>(y)               | scCD27<br>(y)              | scCD124<br>(y)             |
|-------------------------------------------|-----------------------------------|-----------------------------|-----------------------------|-----------------------------|----------------------------|----------------------------|
| Kendall's Tau                             | <i>Smarca4</i> <sup>fl/fl</sup>   | 0.33                        | 0.43                        | 0.26                        | 0.32                       | 0.30                       |
|                                           | <i>Smarca4</i> <sup>ΔT</sup>      | 0.06                        | 0.19                        | 0.08                        | 0.13                       | 0.24                       |
| Fisher's Z<br>transformation<br>(p-value) | Are<br>correlations<br>different? | Yes<br>Z=28.94<br>(p<0.001) | Yes<br>Z=27.23<br>(p<0.001) | Yes<br>Z=19.33<br>(p<0.001) | Yes<br>Z=9.67<br>(p<0.001) | Yes<br>Z=8.07<br>(p<0.001) |

**Supplementary Figure 9. a**, Data from the mixed bone marrow chimera experiment showing the expression (MFI) of cell markers in WT (CD45.1) or *Smarca4*<sup>ΔT</sup> (CD45.2) EOMES<sup>lo</sup> and EOMES<sup>hi</sup> CD3<sup>+</sup>CD8SP thymocytes after IL-4c injections. Horizontal bars indicate median ± interquartile range (MFI). Each point represents a single mouse, n=6 mixed bone marrow chimera (CD3ε<sup>-/-</sup> mice previously irradiated and injected with a mix of 50% bone marrow from CD45.1 WT mice and 50% bone marrow from CD45.2 *Smarca4*<sup>ΔT</sup> mice) that all received 4 daily intraperitoneal IL-4c injections (see **Fig. 7d** experimental scheme). Statistics were calculated using Mann-Whitney test. \*\* P < 0.01. **b**, Kendall's Tau from correlations between single-cell (sc) fluorescences for EOMES and scCXCR3, scCD122, scLy6C, scCD27, and scCD124 are shown for the two representative IL-4c-injected mice (*Smarca4*<sup>fl/fl</sup> and *Smarca4*<sup>ΔT</sup>) displayed in **Fig. 7c** and compared using Fisher's Z transformation.

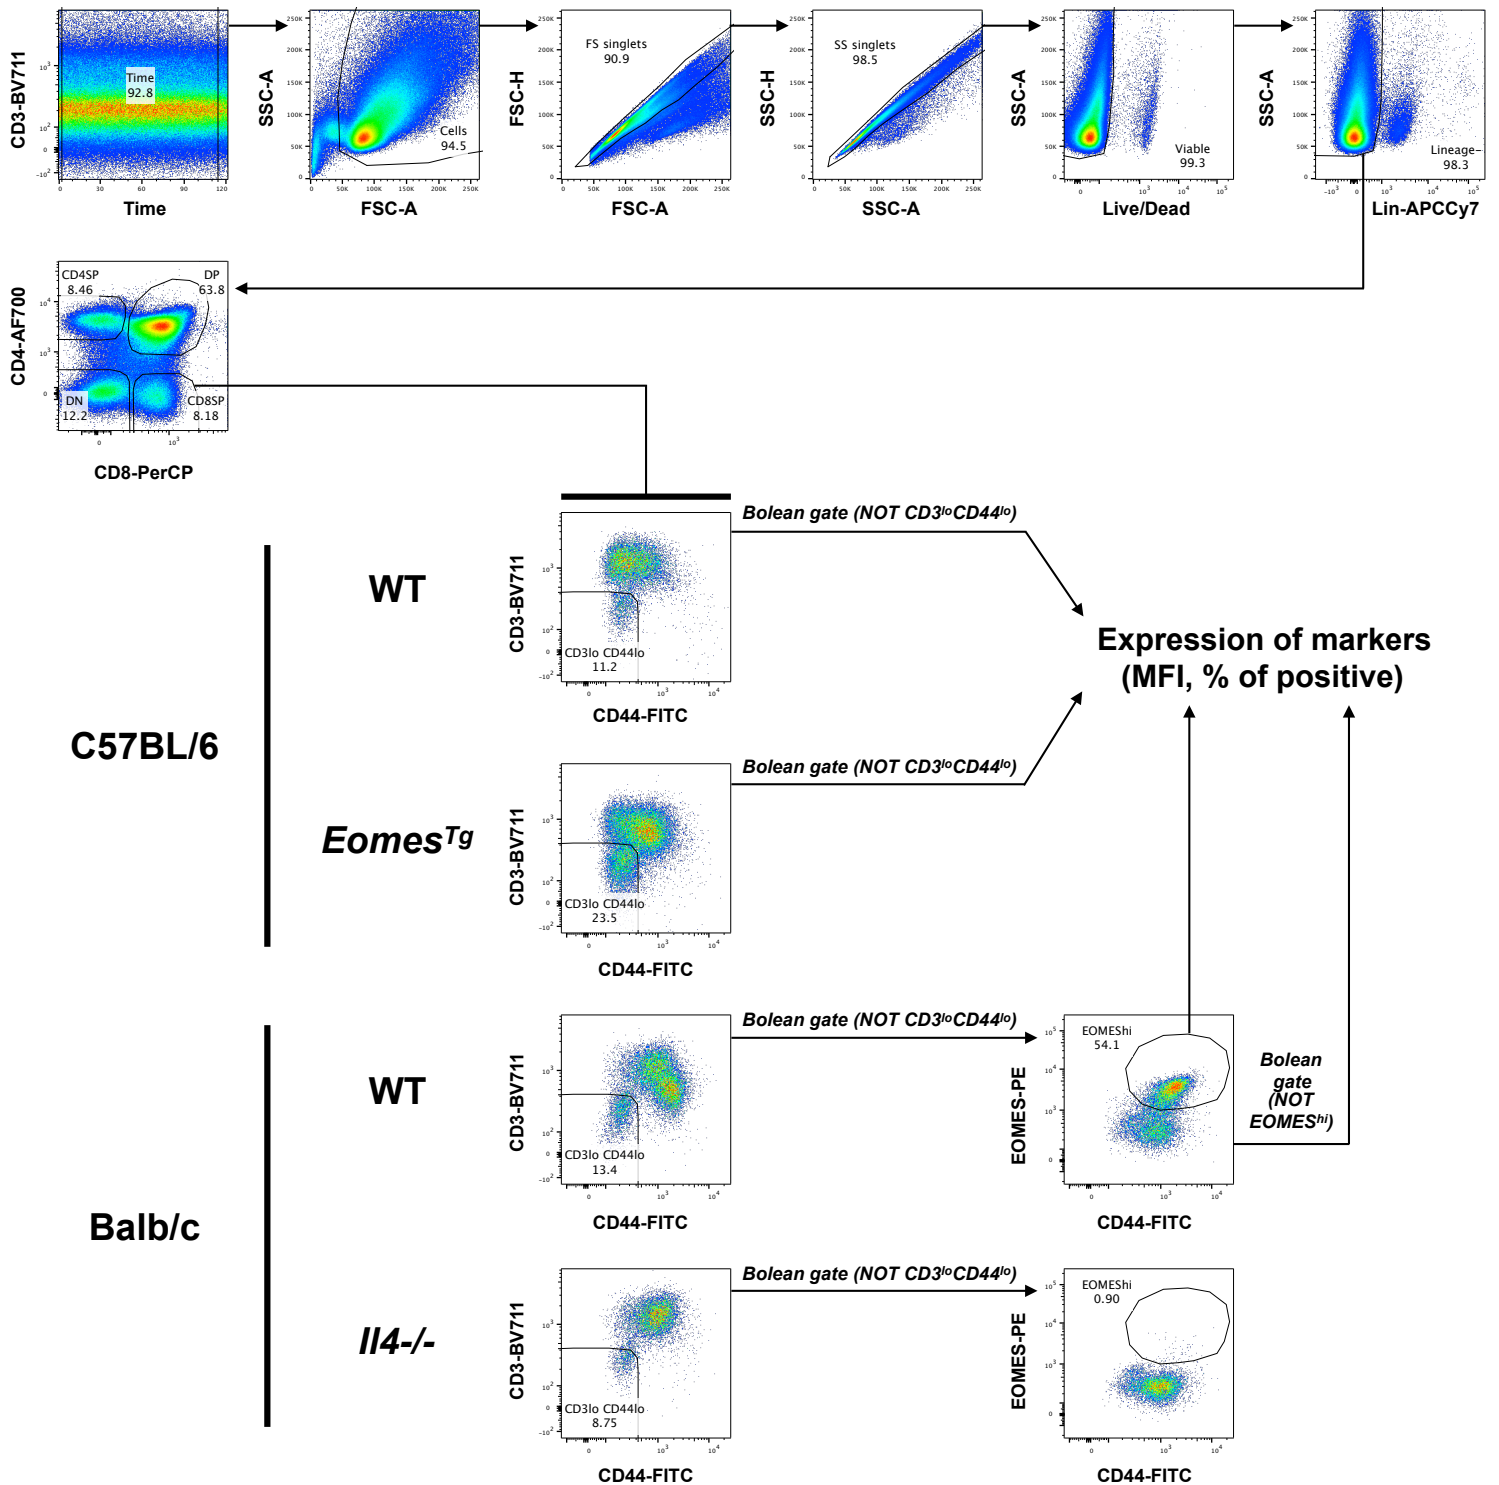

**Supplementary Figure 10.** Sequential gating strategy used to select, within a stable acquisition time frame, live-singlet non-CD3<sup>lo</sup>CD44<sup>lo</sup> CD8SP thymocytes (more generally referred to throughout the manuscript as CD3<sup>+</sup>CD8SP thymocytes) and Balb/c EOMES<sup>hi</sup> and EOMES<sup>lo</sup> (Bolean gate NOT EOMES<sup>hi</sup>) CD3<sup>+</sup>CD8SP thymocytes. This strategy was universally applied to select CD3<sup>+</sup>CD8SP thymocytes (Fig. 1a-c, Fig. 5a-c, Fig. 7c-f, Supplementary Figures 1, 4, 5, 7, 9 and 11), with the particularity that the selection of Lineage-negative cells (Lin: CD11b-CD11c-CD19-Gr1-NK1.1) was only applied in Fig. 5a to assess the frequencies of double negative-positive (DN-DP) and CD4-CD8 single positive (SP) thymocytes. CD8<sup>+</sup> splenocytes (Fig. 7g,h) were selected as shown here for CD8SP thymocytes (without the Lineage gate) and naïve (N) CD8<sup>+</sup> splenocytes were defined with a boolean gate NOT-TM AND NOT-VM (gating of VM and TM cells is shown in Fig. 7g).

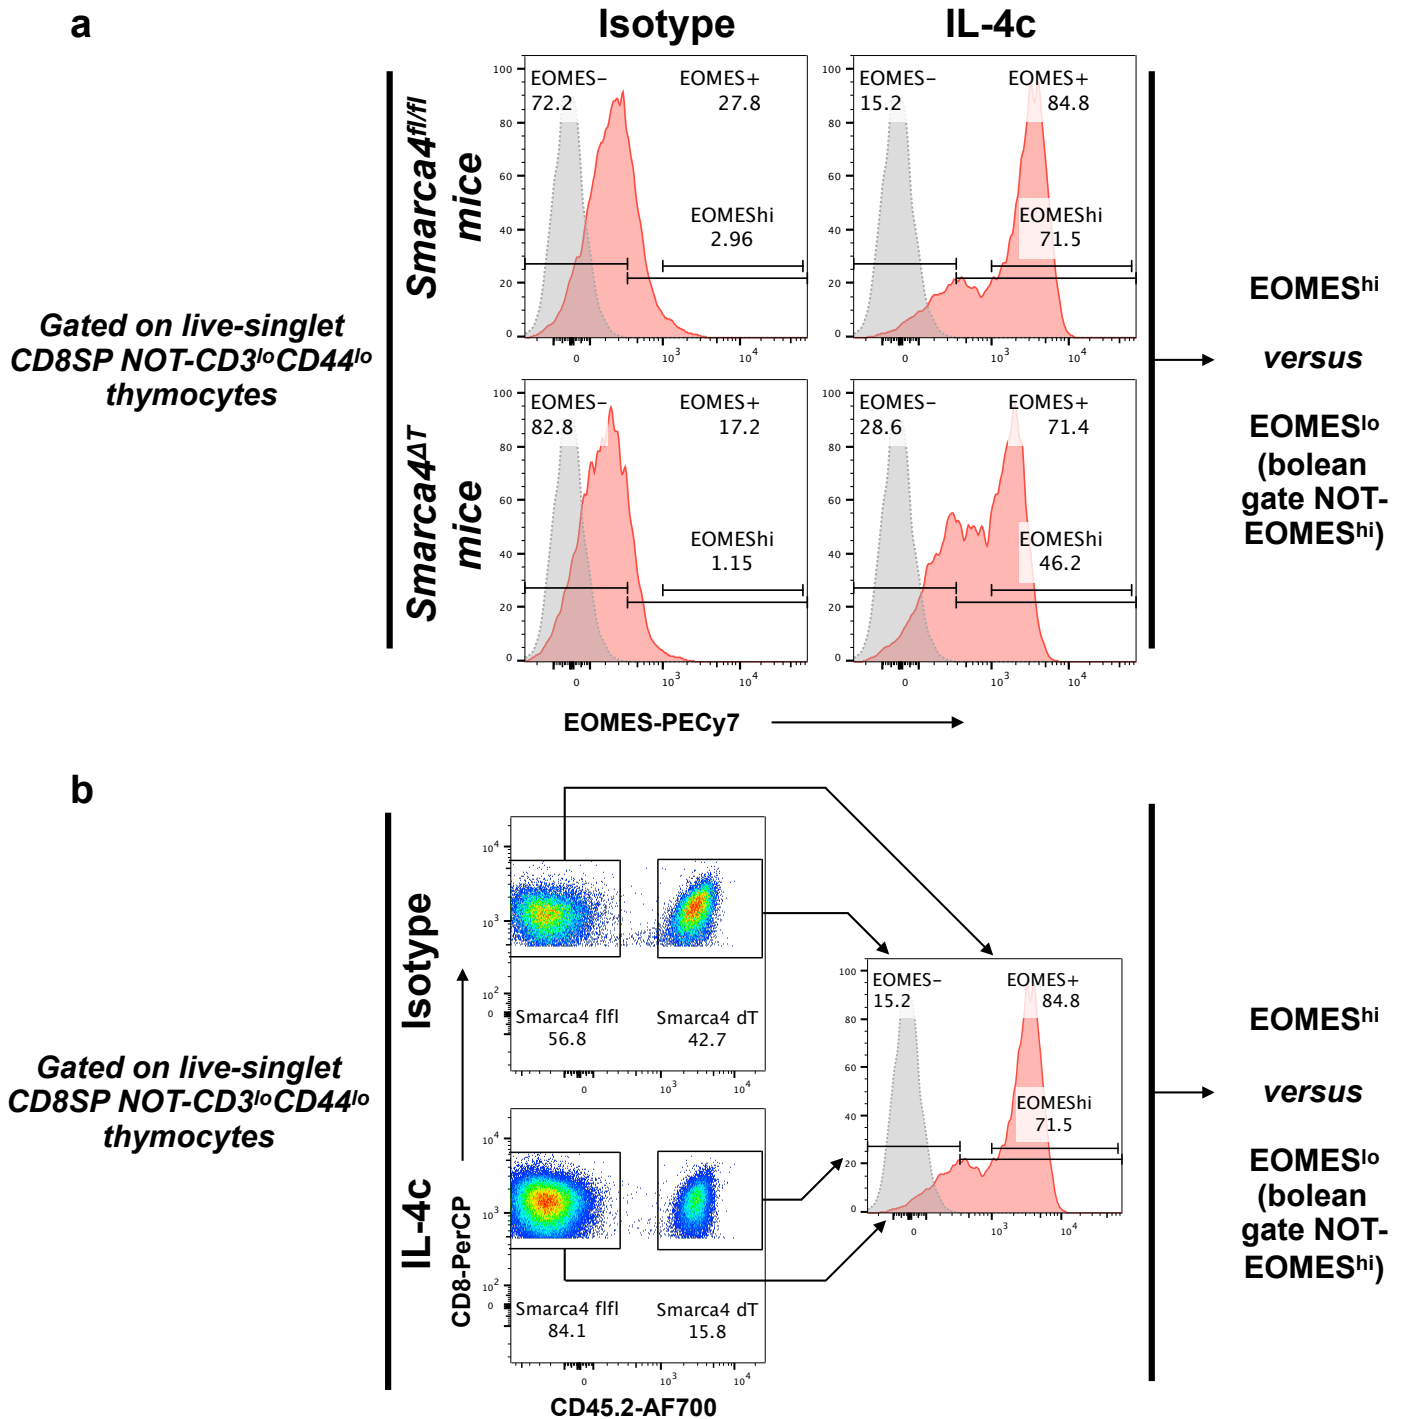

**Supplementary Figure 11. a**, Gating strategy used for the comparison of EOMES<sup>lo</sup> and EOMES<sup>hi</sup> CD3<sup>+</sup>CD8SP thymocytes from *Smarca4<sup>fl/fl</sup>* and *Smarca4<sup>AT</sup>* mice after isotype control or IL-4 complex (IL-4c) injection (this gating strategy was used for **Fig. 7c,e,f** and **Supplementary Figure 9b**). **b**, Gating strategy used for the comparison of EOMES<sup>lo</sup> and EOMES<sup>hi</sup> cells among *Smarca4<sup>fl/fl</sup>* (CD45.1<sup>+</sup>CD45.2<sup>-</sup>) or *Smarca4<sup>AT</sup>* (CD45.1<sup>-</sup>CD45.2<sup>+</sup>) CD3<sup>+</sup>CD8SP thymocytes from mixed bone marrow chimeras (see experimental scheme, **Fig. 7d**) after isotype control or IL-4 complex (IL-4c) injection (this gating strategy was used for **Fig. 7d** and **Supplementary Figure 9a**). Gray histograms represent fluorescence minus one controls, red histograms represent EOMES expression on gated cells. Percentages of cell populations are shown.
